# Supplementary material for: Cost-Effectiveness of PET/CT Surveillance Schedules to Detect Distant Recurrence of Resected Stage III Melanoma
Source: MDPI journal article supplement (doi:10.3390/ijerph19042331), 2022-02-17
Supplement: s1 [file s1]

**Supplementary Table S1: Base Case Model Parameters and Sensitivity Analysis Ranges.**

| Parameter                                                             | Base case value | Sensitivity analysis range | Source                 |
|-----------------------------------------------------------------------|-----------------|----------------------------|------------------------|
| <b>Disease characteristics</b>                                        |                 |                            |                        |
| Rate of distant recurrence at 5 years in no routine imaging group     | 43%             | 31% - 47%                  | MIA cohort             |
| Rate of distant recurrence at 5 years in 12-monthly imaging group     | 39%             | 27% - 38%                  |                        |
| Rate of distant recurrence at 5 years in 6-monthly imaging group      | 55%             | 29% - 59%                  |                        |
| Rate of distant recurrence at 5 years in 3 to 4-monthly imaging group | 55%             | 29% - 59%                  |                        |
| <b>Diagnostic accuracy</b>                                            |                 |                            |                        |
| Sensitivity of PET/CT                                                 | 79%             | 70% – 86%                  | 33                     |
| Specificity of PET/CT                                                 | 88%             | 86% – 90%                  | 33                     |
| Sensitivity of clinical examination                                   | 71.4%           | 55% – 84%                  | 34                     |
| Specificity of clinical examination                                   | 99.6%           | 99% – 99.8%                | 34                     |
| <b>Costs (AUD)</b>                                                    |                 |                            |                        |
| Whole body PET/CT                                                     | 1128.75         | –                          | MBS #61553, MBS #      |
| Ultrasound                                                            | 92.75           | –                          | MBS #55812             |
| MRI (Brain and Head)                                                  | 342.75          | –                          | MBS #63001             |
| X Ray (Chest and Abdomen)                                             | 80.60           | –                          | MBS #58903, MBS #58503 |
| FNAB                                                                  | 200.75          | –                          | MBS #55054, MBS #30075 |
| Bone Scan (whole body)                                                | 407.85          | –                          | MBS # 61421            |
| Clinical follow-up (Specialist)                                       | 65.20           | –                          | MBS #116               |
| Mutation analysis                                                     | 196.35          | –                          | MBS #73336             |
| Core Biopsy                                                           | 127.30          | 134.65 – 997.20            | MBS #30075, AR-DRG     |
| Serum lactate dehydrogenase (LDH)                                     | 8.25            | –                          | MBS #66500             |
| Cost of treatment: 12-month cost—stage III unresectable/IV            |                 |                            | 30                     |
|                                                                       | 115,072         | 105,208 -125,573           |                        |
